# Supplementary material for: Novel mechanisms to inhibit HIV reservoir seeding using Jak inhibitors
Source: PLOS journal article supplement (doi:10.1371/journal.ppat.1006740), 2017-12-21
Supplement: S19 (10.1371/journal.ppat.1006740.s019) [file journal.ppat.1006740.s019]

**S1 Table.** Profile of ART-treated HIV infected subjects including CD4, CD8 T cell counts, viral load, time individual has been HIV-infected, and whether individual is receiving ART.

| Patient Code | Class (VL) | Class (VL and CD4 count) | nadir CD4 | pre-ART HIV RNA | CD4  | CD8  | CD4/CD8 | VLc  | ART | T-inf | Aviremic |
|--------------|------------|--------------------------|-----------|-----------------|------|------|---------|------|-----|-------|----------|
| IDR 236      | aviremic   | IR                       | 323       | N/A             | 916  | 1307 | 0.70    | 98   | Yes | 16    | 2        |
| IDR 237      | aviremic   | IR                       | 249       | 50034           | 618  | 579  | 1.07    | < 50 | Yes | 7     | 4        |
| IDR 239      | aviremic   | IR                       | 276       | 8691            | 687  | 1005 | 0.68    | < 50 | Yes | 15    | 7        |
| IDR 244      | aviremic   | IR                       | 360       | 217             | 616  | 1230 | 0.50    | < 50 | Yes | 25    | 8        |
| ST 016       | aviremic   | IR                       | N/A       | N/A             | 558  | 972  | 0.57    | < 50 | Yes | 25    | 10       |
| IDR 266      | aviremic   | IR                       | 207       | 15959           | 520  | 560  | 0.93    | < 50 | Yes | 5     | 4        |
| IDR 271      | aviremic   | IR                       | 255       | 408430          | 653  | 1158 | 0.56    | < 50 | Yes | 10    | 9        |
| IDR 276      | aviremic   | IR                       | 170       | N/A             | 419  | 356  | 1.18    | < 50 | Yes | 6     | 5        |
| IDR 248      | aviremic   | IR                       | 10        | 68628           | 517  | 718  | 0.72    | < 50 | Yes | 6     | 5        |
| IDR 279      | aviremic   | IR                       | 244       | 8189            | 1139 | 1034 | 1.10    | < 50 | Yes | 24    | 2        |
| IDR 283      | aviremic   | IR                       | 219       | 7395            | 649  | 450  | 1.44    | < 50 | Yes | 6     | 5        |
| IDR 267      | aviremic   | NIR                      | 133       | 4781            | 372  | 631  | 0.59    | < 50 | Yes | 6     | 5        |
| IDR 273      | aviremic   | NIR                      | 69        | 6728            | 115  | 467  | 0.25    | < 50 | Yes | 3     | 2        |
| IDR 256      | aviremic   | NIR                      | 3         | 52953           | 97   | 410  | 0.24    | < 50 | Yes | 24    | 3        |
| IDR 258      | aviremic   | NIR                      | 54        | 32864           | 288  | 667  | 0.43    | < 50 | Yes | 23    | 3        |
| IDR 259      | aviremic   | NIR                      | 6         | 62174           | 326  | 677  | 0.48    | < 50 | Yes | 19    | 4        |
| IDR 281      | aviremic   | NIR                      | 331       | 111             | 340  | 262  | 1.30    | < 50 | Yes | 23    | 4        |
| IDR 238      | aviremic   | RT                       | 63        | 7161            | 63   | 346  | 0.18    | < 50 | Yes | 2     | 1        |
| # 888        | aviremic   | RT                       | N/A       | N/A             | 797  | 934  | 0.85    | < 50 | Yes | 2     | 1        |
| IDR 241      | aviremic   | RT                       | 252       | N/A             | 469  | 969  | 0.48    | < 50 | Yes | 11    | 3        |
| IDR 240      | aviremic   | RT                       | 168       | 50721           | 384  | 682  | 0.56    | < 50 | Yes | 2     | 1        |
| IDR 261      | aviremic   | RT                       | 301       | 34117           | 537  | 637  | 0.84    | < 50 | Yes | 2     | 1        |
| IDR 262      | aviremic   | RT                       | 251       | 24905           | 502  | 747  | 0.67    | < 50 | Yes | 2     | 1        |
| IDR 263      | aviremic   | RT                       | 279       | 12996           | 455  | 491  | 0.93    | < 50 | Yes | 7     | 1        |
| IDR 264      | aviremic   | RT                       | 66        | N/A             | 112  | 657  | 0.17    | < 50 | Yes | 8     | 1        |

|         |          |       |     |        |     |      |      |      |     |    |   |
|---------|----------|-------|-----|--------|-----|------|------|------|-----|----|---|
| IDR 246 | aviremic | RT    | 9   | N/A    | 447 | 348  | 1.28 | 54   | Yes | 17 | 2 |
| IDR 247 | aviremic | RT    | 326 | 34363  | 488 | 514  | 0.95 | < 50 | Yes | 14 | 1 |
| IDR 277 | aviremic | RT    | 162 | 19537  | 275 | 1146 | 0.24 | < 50 | Yes | 1  | 1 |
| IDR 278 | aviremic | RT    | 1   | 318432 | 260 | 533  | 0.49 | < 50 | Yes | 15 | 1 |
| IDR 280 | aviremic | RT    | 50  | N/A    | 209 | 837  | 0.25 | < 50 | Yes | 2  | 1 |
| IDR 245 | aviremic | RT    | 42  | 162094 | 210 | 686  | 0.31 | < 50 | Yes | 4  | 2 |
| IDR 265 | aviremic | ST NC | 132 | N/A    | 400 | 738  | 0.54 | < 50 | Yes | 5  | 4 |
| IDR 275 | aviremic | ST NC | 167 | 20753  | 445 | 873  | 0.51 | < 50 | Yes | 7  | 3 |
| IDR 257 | aviremic | ST NC | 204 | N/A    | 369 | 350  | 1.05 | < 50 | Yes | 5  | 4 |
| IDR 260 | aviremic | ST NC | 140 | 66697  | 382 | 229  | 1.67 | < 50 | Yes | 5  | 4 |
| IDR 282 | aviremic | ST NC | 28  | 32100  | 449 | 582  | 0.77 | < 50 | Yes | 20 | 4 |
| IDR 284 | aviremic | ST NC | 114 | 263415 | 569 | 979  | 0.58 | < 50 | Yes | 6  | 5 |

**Detailed Class:** IR (VL<50, CD4 count > 500 for 2 years), NIR (VL<50, CD4 count < 350 for 2 years), ST NC (VL<50, CD4 count in between 350 and 500), RT (VL<50 for 1 year or less)

**nadir CD4:** Cells per ml

**pre-ART HIV RNA:** copies/ml

**CD4 and CD8:** Cells per ml

**VLc:** Viral load (copies/ml)

**ART:** Antiretroviral Therapy; None: never received; Yes: received

**T-inf:** Time since HIV infection (Year)

**Aviremic:** Time of undetectable viremia (with or without ART) in years

**IR:** Immune Responder

**NIR:** Non Immune Responder

**ST NC:** Successfully treated Non Classified (CD4 T cell counts in between IR and NIR)

**RT:** Recently Treated
